# Supplementary material
Source: HighWire-hosted journal article supplement (http://www.cmaj.ca/highwire/filestream/73440/field_highwire_adjunct_files/0/190247-image-1-at.pdf)

## Appendix 1

Computed tomography scan of the chest of a 10-year-old girl with eosinophilic granulomatosis with polyangiitis, showing 5-mm ground glass opacities.

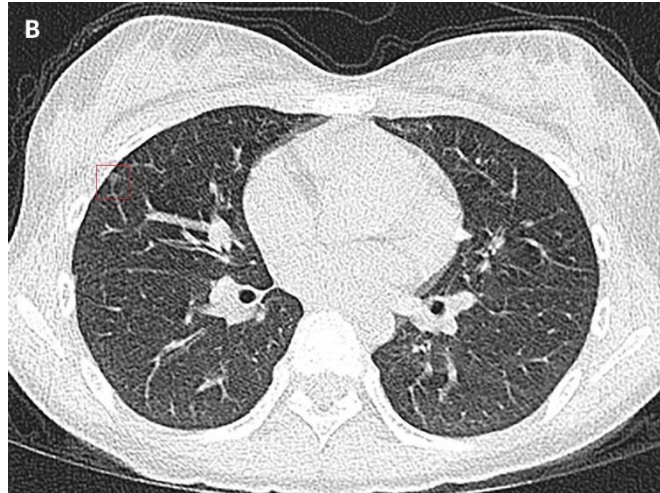

Supplement: 190247-image-1-at.pdf [file 190247-image-1-at.pdf]
